# Supplementary material
Source: PubMed Central journal article supplement (PMC5244301)
Supplement: AEM.02322-16_zam999117631s1.pdf [file AEM.02322-16_zam999117631s1.pdf]

Biogeography of *Oenococcus oeni* reveals distinctive but non-specific populations in wine-producing regions

Mariette El Khoury, Hugo Campbell-Sills, Franck Salin, Erwan Guichoux, Olivier Claisse, Patrick M. Lucas

Supplemental material

**FIG. S1.** Phylogenomic tree based on 50 *O. oeni* genome sequences used to define groups of genetically related strains. The tree was obtained with ANIm using publicly available genome sequences as described in (1). Groups indicated in red were delineated on the basis of genetic distances between strains and named A1 to A6 and B1 to B3 to conform to group designations employed in (2).

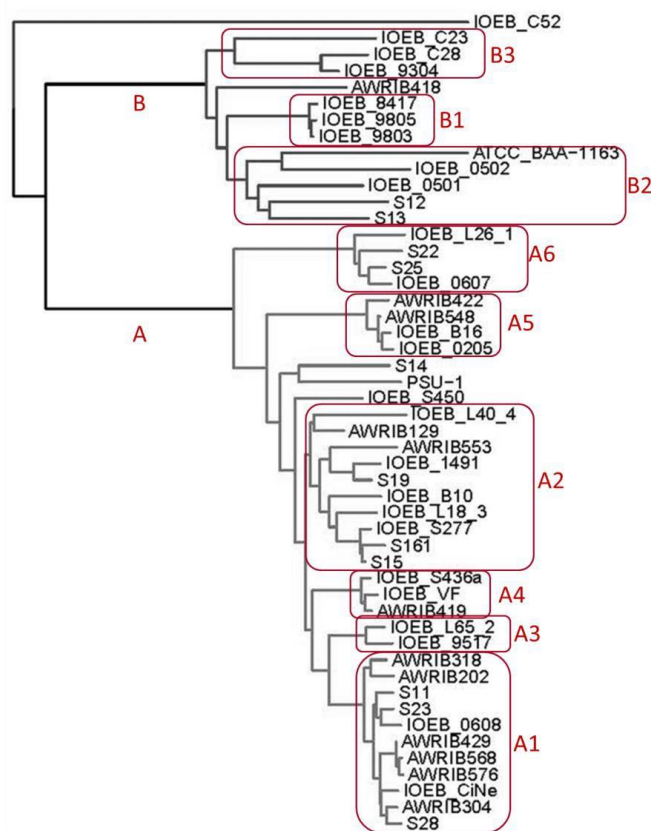

**TABLE S1.** SNPs used for Sequenom genotyping

| Group | Number of SNPs per genetic group |                     |                     |
|-------|----------------------------------|---------------------|---------------------|
|       | Total                            | Manual preselection | Used for genotyping |
| A     | 1626                             | 10                  | 4                   |
| A1    | 198                              | 10                  | 5                   |
| A2    | 11                               | 7                   | 4                   |
| A3    | 164                              | 9                   | 5                   |
| A4    | 207                              | 9                   | 3                   |
| A5    | 808                              | 10                  | 2                   |
| A6    | 1181                             | 7                   | 2                   |
| B     | 1695                             | 9                   | 6                   |
| B1    | 130                              | 10                  | 5                   |
| B2    | 12                               | 0                   | 0                   |
| B3    | 70                               | 13                  | 4                   |
| Total | 6120                             | 94                  | 40                  |

**TABLE S2.** Primers used for SNP genotyping.

| TERM  | SNP_ID          | 2nd-PCR                          | 1st-PCR                         | AMP_LEN | UP_CONF | MP_CONF | Tm   | PcGC | PWARN | UEP_DIR | UEP_MASS |
|-------|-----------------|----------------------------------|---------------------------------|---------|---------|---------|------|------|-------|---------|----------|
| IPLEX | A1oeoe_0413_212 | ACGTTGGATGTGGTTTCCTGCTGGATCAC    | ACGTTGGATGGTTTTCCGATTTGCGTGGCC  | 94      | 99.9    | 70.7    | 46.0 | 60.0 | d     | F       | 4553.0   |
| IPLEX | A2oeoe0450_200  | ACGTTGGATGAGTGTATAAAGCGGCATGG    | ACGTTGGATGTACACCGCATCGCAATCATC  | 109     | 98.2    | 70.7    | 55.0 | 73.3 | D     | R       | 4665.0   |
| IPLEX | A3oeoe_0425_112 | ACGTTGGATGAGCAAGGTCTTTTCTCC      | ACGTTGGATGTGGCAATCATCTGATCTTGG  | 119     | 97.1    | 70.7    | 47.8 | 56.2 | D     | R       | 5057.3   |
| IPLEX | A3oeoe_0529_139 | ACGTTGGATGGCCTCTTGAATCTGCTGCTT   | ACGTTGGATGGGATAACTTGGAGGCGATTG  | 119     | 96.1    | 70.7    | 46.8 | 41.2 | ds    | R       | 5120.4   |
| IPLEX | A3oeoe_0433_150 | ACGTTGGATGGGTGTTTTAGCTCTTTGGC    | ACGTTGGATGAGCGAACCAAGGCTTCCCTG  | 109     | 98.2    | 70.7    | 46.2 | 53.3 | D     | F       | 5217.4   |
| IPLEX | A5oeoe_0326_101 | ACGTTGGATGATCGATATGCCATGAACGG    | ACGTTGGATGAAGTTACCTTCCAACAGTC   | 100     | 100.0   | 70.7    | 49.4 | 56.2 | R     | F       | 5244.4   |
| IPLEX | Boeoe_0402_105  | ACGTTGGATGGCTCAAGATGATCTTTCC     | ACGTTGGATGCCTTAAATCAGCACGTTC    | 111     | 98.1    | 70.7    | 46.1 | 47.1 | D     | F       | 5265.4   |
| IPLEX | Boeoe_0340_216  | ACGTTGGATGGGGATTTTTATGATCGTGG    | ACGTTGGATGACCAGGCCATCCAAAAGAAC  | 100     | 98.6    | 70.7    | 47.7 | 50.0 | ds    | F       | 5616.6   |
| IPLEX | A4oeoe_0344_196 | ACGTTGGATGCCGATTTTTGCTACTTGCC    | ACGTTGGATGTGCTCATCTCACATTGCC    | 111     | 98.1    | 70.7    | 46.9 | 36.8 | R     | R       | 5777.8   |
| IPLEX | A5oeoe_0420_106 | ACGTTGGATGCGCAATTCGCTGGAAATCT    | ACGTTGGATGGGTTATGCTTATGAAACCTG  | 107     | 91.8    | 70.7    | 46.0 | 42.1 | D     | R       | 5802.8   |
| IPLEX | A2oeoe0450_176  | ACGTTGGATGCGATGTTCTGAAAATGGG     | ACGTTGGATGATTGCCAATTCGATGGCAC   | 94      | 98.4    | 70.7    | 48.0 | 44.4 | F     | F       | 5900.9   |
| IPLEX | Boeoe_0456_151  | ACGTTGGATGGGACATCCAGTGGAAAATG    | ACGTTGGATGGCAATCAACTCCGAAGATCCG | 102     | 100.0   | 70.7    | 47.2 | 35.0 | D     | R       | 6073.0   |
| IPLEX | B1oeoe_0360_186 | ACGTTGGATGCTTGGCGAGTGTTCCTGG     | ACGTTGGATGCTTCCAAAACCATTCGATG   | 97      | 94.3    | 70.7    | 46.0 | 35.0 | d     | F       | 6207.1   |
| IPLEX | Aoeoe_0558_100  | ACGTTGGATGTGATCGTTTATCTGACCCG    | ACGTTGGATGACCACCGCAACATATGCAAG  | 104     | 99.9    | 70.7    | 48.2 | 38.1 | d     | R       | 6349.2   |
| IPLEX | A2oeoe0450_97   | ACGTTGGATGAGAAGTGGATTGGTCTTCCC   | ACGTTGGATGCCAAAACCTTGGCCATATC   | 99      | 100.0   | 70.7    | 49.8 | 58.8 | D     | F       | 6376.2   |
| IPLEX | A3oeoe_0424_156 | ACGTTGGATGCCGCTACAATAGTTGTATG    | ACGTTGGATGAACAGGGGACACATGTCAAG  | 99      | 94.2    | 70.7    | 45.0 | 35.0 | g     | R       | 6500.2   |
| IPLEX | A1oeoe_0449_29  | ACGTTGGATGGTGCAGTAACCTGCACAATC   | ACGTTGGATGGAAGATTTCTGTTCTATCG   | 85      | 86.8    | 70.7    | 45.2 | 36.8 | D     | R       | 6565.3   |
| IPLEX | B1oeoe_0384_211 | ACGTTGGATGTTTTTCTGCTCCAAAGCGG    | ACGTTGGATGGGGTGCAGAAAATAATTGGG  | 87      | 97.9    | 70.7    | 49.1 | 31.8 | R     | R       | 6730.4   |
| IPLEX | Aoeoe_0642_106  | ACGTTGGATGCCCAATCATTAAAGGCG      | ACGTTGGATGTCGGGCTGTATACAAAGGTC  | 106     | 99.9    | 70.7    | 46.7 | 38.1 | F     | F       | 6742.4   |
| IPLEX | A2oeoe0450_37   | ACGTTGGATGTTTTGGGATTGGTGCACGAG   | ACGTTGGATGGCAATCCATAGGCATAAAGC  | 92      | 98.3    | 70.7    | 47.1 | 44.4 | d     | F       | 6848.5   |
| IPLEX | Aoeoe_0563_200  | ACGTTGGATGACTCGATTTGCTGATCTC     | ACGTTGGATGAATGCCCTTCAACACGCTGG  | 102     | 94.3    | 70.7    | 47.2 | 35.0 | D     | R       | 6949.5   |
| IPLEX | B3oeoe_1166_150 | ACGTTGGATGACCAAGTATCGGACCGATTG   | ACGTTGGATGCCGAAAAATCGTCAAGCCTC  | 98      | 100.0   | 70.7    | 46.5 | 42.1 | D     | R       | 6952.5   |
| IPLEX | B3oeoe_0574_239 | ACGTTGGATGTTGGAGATTAGCTTGGAAAG   | ACGTTGGATGCTATGCTCCTGATTTAACG   | 111     | 92.6    | 70.7    | 48.8 | 50.0 | F     | F       | 7095.6   |
| IPLEX | B1oeoe_0375_150 | ACGTTGGATGAGCCACAAAGACAGGCAAAC   | ACGTTGGATGGTCTGCTTGGTCAAACACG   | 108     | 99.7    | 70.7    | 49.3 | 29.2 | F     | F       | 7312.8   |
| IPLEX | B1oeoe_0379_150 | ACGTTGGATGGCCGTTTTATCGTTTGGAC    | ACGTTGGATGCGCGCAATCACTTGAAGG    | 119     | 97.1    | 70.7    | 47.0 | 30.4 | F     | F       | 7381.8   |
| IPLEX | A4oeoe_0390_191 | ACGTTGGATGTTCTTAGCAGAAAAGAGCG    | ACGTTGGATGAACGACACTGCTTTGAACG   | 112     | 98.0    | 70.7    | 51.0 | 38.1 | DS    | R       | 7560.9   |
| IPLEX | A3oeoe_0370_150 | ACGTTGGATGCCCTCTGTGATATTTGTTG    | ACGTTGGATGCTCAACTCAAACAGAGGG    | 117     | 96.0    | 70.7    | 48.9 | 28.0 | R     | R       | 7612.0   |
| IPLEX | Boeoe_0622_105  | ACGTTGGATGCTTCTTATTGATCGTTTCCAG  | ACGTTGGATGAAGAGAAAAGATAATATCAG  | 115     | 62.2    | 70.7    | 45.4 | 28.6 | D     | F       | 7742.0   |
| IPLEX | B3oeoe_0490_154 | ACGTTGGATGAGCTTCCGACGATTTGTTGGG  | ACGTTGGATGCGCGCATATGTTGCTGAAAC  | 116     | 99.0    | 70.7    | 48.7 | 36.4 | D     | R       | 7913.2   |
| IPLEX | A6oeoe_0378_102 | ACGTTGGATGAAAAGCTACGTTATGGACTG   | ACGTTGGATGATTTTTCTGAGCCAGGCC    | 120     | 93.0    | 70.7    | 49.4 | 38.1 | h     | F       | 8014.2   |
| IPLEX | A1oeoe_0391_241 | ACGTTGGATGTTAACAAAGAGCCGAAACAGAG | ACGTTGGATGTTCCGATGAAACCGGAGTG   | 114     | 97.8    | 70.7    | 47.4 | 33.3 | DS    | F       | 8048.3   |
| IPLEX | A6oeoe_0423_179 | ACGTTGGATGCAACCTTTTCAACAATGGG    | ACGTTGGATGGTCTGCTCATTAGTTG      | 114     | 93.6    | 70.7    | 53.8 | 47.8 | Dg    | R       | 8171.3   |
| IPLEX | Aoeoe_0663_109  | ACGTTGGATGAGCTTCCGCAAGAGAAAC     | ACGTTGGATGGCGGCATATACCTTAAATC   | 107     | 99.8    | 70.7    | 45.1 | 20.8 | F     | F       | 8317.5   |
| IPLEX | B3oeoe_1057_150 | ACGTTGGATGGCAACACGCTTTCATTAG     | ACGTTGGATGGTAAAGGATCGAGGCTCAC   | 110     | 98.2    | 70.7    | 45.9 | 30.4 | D     | F       | 8402.5   |
| IPLEX | Boeoe_0357_114  | ACGTTGGATGTGGACACATCGGATGAATGG   | ACGTTGGATGAGGACGCTGTTTATCAAC    | 99      | 100.0   | 70.7    | 54.4 | 47.8 | D     | F       | 8404.5   |
| IPLEX | B1oeoe_0428_164 | ACGTTGGATGTGCTGATTTGTTTCCACCAC   | ACGTTGGATGCTGAAAAACAAAGAGACGG   | 116     | 92.1    | 70.7    | 45.9 | 28.0 | DH    | F       | 8488.5   |
| IPLEX | A1oeoe_0440_163 | ACGTTGGATGTCAGCTCATTGCTTGTGGC    | ACGTTGGATGCGCTGCCAAATCACTTAACT  | 113     | 97.9    | 70.7    | 50.9 | 33.3 | DH    | F       | 8553.6   |
| IPLEX | Boeoe_0327_114  | ACGTTGGATGGAACCTGCTTCCAAATCTC    | ACGTTGGATGTAACCGGAACCCAAATGACG  | 106     | 98.4    | 70.7    | 48.3 | 25.0 | dh    | R       | 8631.6   |
| IPLEX | A4oeoe_0483_150 | ACGTTGGATGGTCTGGCTAATTTGTA AAC   | ACGTTGGATGACCAAGTACCGGATTTGGAC  | 110     | 94.0    | 70.7    | 47.7 | 29.2 | d     | F       | 8710.7   |
| IPLEX | A1oeoe_0469_150 | ACGTTGGATGCTGAAAAAGCTGTTAAAC     | ACGTTGGATGTCAGCCGCTTTCGGAATC    | 97      | 88.2    | 70.7    | 53.4 | 40.0 | dh    | F       | 8878.8   |

**Extension primer**

| TERM  | SNP_ID          | UEP_SEQ                    | EXT1_CALL | EXT1_MASS | EXT1_SEQ                    | EXT2_CALL | EXT2_MASS | EXT2_SEQ                    |
|-------|-----------------|----------------------------|-----------|-----------|-----------------------------|-----------|-----------|-----------------------------|
| IPLEX | A1oeoe_0413_212 | CACCGATGGCCTATG            | C         | 4800.2    | CACCGATGGCCTATGC            | T         | 4880.1    | CACCGATGGCCTATGT            |
| IPLEX | A2oeoe0450_200  | CGCGCATGGTTCGGG            | G         | 4912.2    | CGCGCATGGTTCGGCG            | A         | 4992.1    | CGCGCATGGTTCGGGT            |
| IPLEX | A3oeoe_0425_112 | GCCTCCACCACTTTTGC          | G         | 5304.5    | gCCTCCACCACTTTTGC           | T         | 5328.5    | gCCTCCACCACTTTTGC           |
| IPLEX | A3oeoe_0529_139 | TCTGTCAATTGCCACA           | T         | 5391.6    | TCTGTCAATTGCCACAA           | C         | 5407.6    | TCTGTCAATTGCCACAG           |
| IPLEX | A3oeoe_0433_150 | ggTTGGCGATCATGCTC          | C         | 5464.6    | ggTTGGCGATCATGCTCC          | T         | 5544.5    | ggTTGGCGATCATGCTCT          |
| IPLEX | A5oeoe_0326_101 | CTGAGGTCGACGACAGA          | G         | 5491.6    | CTGAGGTCGACGACAGAC          | A         | 5571.5    | CTGAGGTCGACGACAGAT          |
| IPLEX | Boeoe_0402_105  | GTTTTGACAAACGATGG          | C         | 5512.6    | GTTTTGACAAACGATGGC          | T         | 5592.5    | GTTTTGACAAACGATGGT          |
| IPLEX | Boeoe_0340_216  | tgTGGATCGTGGTGGAT          | C         | 5863.8    | tgTGGATCGTGGTGGATC          | T         | 5943.7    | tgTGGATCGTGGTGGATT          |
| IPLEX | A4oeoe_0344_196 | CGCTACTTGCCTAATTTAA        | G         | 6025.0    | CGCTACTTGCCTAATTTAAC        | A         | 6104.9    | CGCTACTTGCCTAATTTAAT        |
| IPLEX | A5oeoe_0420_106 | CTGGGAATCTTTCAGAAC         | G         | 6050.0    | CTGGGAATCTTTCAGAAC          | A         | 6129.9    | CTGGGAATCTTTCAGAACT         |
| IPLEX | A2oeoe0450_176  | tAAAATGGGACATCGAG          | A         | 6172.1    | tAAAATGGGACATCGAGA          | T         | 6228.0    | tAAAATGGGACATCGAGT          |
| IPLEX | Boeoe_0456_151  | ACAGATTTTATTTTCCGGC        | G         | 6320.1    | ACAGATTTTATTTTCCGGCC        | A         | 6400.1    | ACAGATTTTATTTTCCGGCT        |
| IPLEX | B1oeoe_0360_186 | AATATGGACAAAACGATGAG       | C         | 6454.3    | AATATGGACAAAACGATGAGC       | T         | 6534.2    | AATATGGACAAAACGATGAGT       |
| IPLEX | Aoeoe_0558_100  | GACCCGCAATAACCTTTTAT       | G         | 6596.3    | GACCCGCAATAACCTTTTATC       | A         | 6676.3    | GACCCGCAATAACCTTTTAT        |
| IPLEX | A2oeoe0450_97   | cccaGCTCTCCGGAGAAACG       | C         | 6623.3    | cccaGCTCTCCGGAGAAACGC       | T         | 6703.2    | cccaGCTCTCCGGAGAAACGT       |
| IPLEX | A3oeoe_0424_156 | cATAGTTGATGGCTAGGATA       | T         | 6771.5    | cATAGTTGATGGCTAGGATAA       | C         | 6787.5    | cATAGTTGATGGCTAGGATAG       |
| IPLEX | A1oeoe_0449_29  | cccCACCTCATTTCGGATAAT      | G         | 6812.5    | cccCACCTCATTTCGGATAATC      | A         | 6892.4    | cccCACCTCATTTCGGATAAT       |
| IPLEX | B1oeoe_0384_211 | AGCGGATCACTTTTTTGATAT      | G         | 6977.6    | AGCGGATCACTTTTTTGATATC      | A         | 7057.5    | AGCGGATCACTTTTTTGATATT      |
| IPLEX | Aoeoe_0642_106  | tGGCCTATACGGAAAATTAATC     | A         | 7013.6    | tGGCCTATACGGAAAATTAATCA     | G         | 7029.6    | tGGCCTATACGGAAAATTAATCG     |
| IPLEX | A2oeoe0450_37   | gaggCCAGGGACCTTTGAAGAA     | A         | 7119.7    | gaggCCAGGGACCTTTGAAGAAA     | G         | 7135.7    | gaggCCAGGGACCTTTGAAGAA      |
| IPLEX | Aoeoe_0563_200  | cccTCTCTTAAATAACTTGGCGT    | T         | 7220.7    | cccTCTCTTAAATAACTTGGCGTA    | C         | 7236.7    | cccTCTCTTAAATAACTTGGCGTG    |
| IPLEX | B3oeoe_1166_150 | tccgGCATAACCTAATTTCCAGC    | G         | 7199.7    | tccgGCATAACCTAATTTCCAGCC    | A         | 7279.6    | tccgGCATAACCTAATTTCCAGCT    |
| IPLEX | B3oeoe_0574_239 | gggtcGCTTGGAAAGTTTCCACG    | T         | 7342.8    | gggtcGCTTGGAAAGTTTCCACG     | T         | 7422.7    | gggtcGCTTGGAAAGTTTCCACG     |
| IPLEX | B1oeoe_0375_150 | AACAAACTGTAAACATCGATTACT   | A         | 7584.0    | AACAAACTGTAAACATCGATTACTA   | T         | 7639.9    | AACAAACTGTAAACATCGATTACT    |
| IPLEX | B1oeoe_0379_150 | gGATAATGATTTATTTCTGCAGAG   | G         | 7669.0    | gGATAATGATTTATTTCTGCAGAG    | T         | 7708.9    | gGATAATGATTTATTTCTGCAGAT    |
| IPLEX | A4oeoe_0390_191 | ccctAGCGCAATTTTCAATCGAAC   | G         | 7808.1    | ccctAGCGCAATTTTCAATCGAAC    | A         | 7888.0    | ccctAGCGCAATTTTCAATCGAACT   |
| IPLEX | A3oeoe_0370_150 | CAACATTTTCTGATTTTTCGGATAT  | G         | 7859.2    | CAACATTTTCTGATTTTTCGGATATC  | A         | 7939.1    | CAACATTTTCTGATTTTTCGGATATT  |
| IPLEX | Boeoe_0622_105  | ggagAATTAATGGTTTGTTCAG     | C         | 7989.2    | ggagAATTAATGGTTTGTTCAGC     | T         | 8069.1    | ggagAATTAATGGTTTGTTCAGT     |
| IPLEX | B3oeoe_0490_154 | ttgaAACTCTCAATCGTATAAACCCG | C         | 8200.4    | ttgaAACTCTCAATCGTATAAACCCG  | A         | 8240.3    | ttgaAACTCTCAATCGTATAAACCCGT |
| IPLEX | A6oeoe_0378_102 | gggtgTTTGTATTTTCTGACCCAG   | C         | 8261.4    | gggtgTTTGTATTTTCTGACCCAG    | T         | 8341.3    | gggtgTTTGTATTTTCTGACCCAGT   |
| IPLEX | A1oeoe_0391_241 | taCGAACAGAGATATATTTAGTTGG  | C         | 8295.4    | taCGAACAGAGATATATTTAGTTGGC  | T         | 8375.4    | taCGAACAGAGATATATTTAGTTGGT  |
| IPLEX | A6oeoe_0423_179 | ccccCAATGGGGTAACTTACCTTCG  | T         | 8442.5    | ccccCAATGGGGTAACTTACCTTCGA  | C         | 8458.5    | ccccCAATGGGGTAACTTACCTTCGG  |
| IPLEX | Aoeoe_0663_109  | ccgGAATTAATTAATAAGCCAAAGAT | A         | 8588.7    | ccgGAATTAATTAATAAGCCAAAGATA | G         | 8604.7    | ccgGAATTAATTAATAAGCCAAAGATG |

|       |                 |                               |   |        |                                |   |        |                                |
|-------|-----------------|-------------------------------|---|--------|--------------------------------|---|--------|--------------------------------|
| iPLEX | B3oeoe_1057_150 | ggtgGCAAGAATTTTATTAAGGGATAC   | A | 8673.7 | ggtgGCAAGAATTTTATTAAGGGATACA   | G | 8689.7 | ggtgGCAAGAATTTTATTAAGGGATACG   |
| iPLEX | Boeoe_0357_114  | gggtGATGAATGGATTGCGAGTCGAAC   | C | 8651.6 | gggtGATGAATGGATTGCGAGTCGAACC   | T | 8731.6 | gggtGATGAATGGATTGCGAGTCGAACT   |
| iPLEX | B1oeoe_0428_164 | cccTTTTCTATAATCATATGGCTAATG   | A | 8759.7 | cccTTTTCTATAATCATATGGCTAATGA   | G | 8775.7 | cccTTTTCTATAATCATATGGCTAATGG   |
| iPLEX | A1oeoe_0440_163 | ccacTTTTATGGCCTTGATAGTCAATGA  | G | 8800.8 | ccacTTTTATGGCCTTGATAGTCAATGAC  | T | 8824.8 | ccacTTTTATGGCCTTGATAGTCAATGAA  |
| iPLEX | Boeoe_0327_114  | agtaTTTTTTTTATTGCGCGAAAGATA   | T | 8902.9 | agtaTTTTTTTTATTGCGCGAAAGATAA   | C | 8918.9 | agtaTTTTTTTTATTGCGCGAAAGATAG   |
| iPLEX | A4oeoe_0483_150 | agttAAACAAATCAAGAAGTTAGAAGAG  | C | 8957.9 | agttAAACAAATCAAGAAGTTAGAAGAGC  | T | 9037.8 | agttAAACAAATCAAGAAGTTAGAAGAGT  |
| iPLEX | A1oeoe_0469_150 | ctgaCTGAAAACAGCTGTTAAACAAGCTC | A | 9150.0 | ctgaCTGAAAACAGCTGTTAAACAAGCTCA | G | 9166.0 | ctgaCTGAAAACAGCTGTTAAACAAGCTCG |

**TABLE S3.** Concatenated SNPs sequences specific for the different genetic groups

| Group | Concatenated sequence of 40 SNPs        |
|-------|-----------------------------------------|
| A0    | TCGAAGACATGCTGACGGCCACGATAGAACCGGTCCTAT |
| A0-1  | TCGAAGACATGCTGACGGCCACGATAGAACCGGTCCCAT |
| A1    | CTTGAGACATGCTGACGGCCACGATAGAACCGGTCCTAT |
| A1-1  | CCTGAGACATGCTGACGGCCACGATAGAACCGGTCCTAT |
| A1-2  | TTTGAGACATGCTGACGGCCACGATAGAACCGGTCCTAT |
| A1-3  | TC-GAGACATGCTGACGGCCACGATAGAACCGGTCCTAT |
| A2    | TCGATAGTATGCTGACGGCCACGATAGAACCGGTCCTAT |
| A2-1  | TCGATAGTATGCTGACGGCCATGATAGAACCGGTCCTAT |
| A2-2  | TCGATAGTATGCTAACGGCCACGATAGAACCGGTCCTAT |
| A2-3  | TCGATAGTATGCTGGCGGCCACGATAGAACCGGTCCTAT |
| A2-4  | TCGGTAGTATGCTGACGGCCACGATAGAACCGGTCCTAT |
| A2-5  | TTGGTAGTATGCTGACGGCCACGATAGAACCGGTCCTAT |
| A2-6  | TCGATAGTATGCTGACGGCCACGATAGAACCGGTCCCAT |
| A2-7  | TCGATAGCATGCTGACGGCCACGATAGAACCGGTCCTAT |
| A2-8  | TCGAAAGTATGCTGACGGCCACGACAGAACCGGTCCTAT |
| A3    | TCGAAGACGCTTCGACGGCCACGATAGAACCGGTCCTAT |
| A3-1  | TCGAAGACGTGTGACGGCCACGATAGAACCGGTCCTA-  |
| A4    | TCGAAGACATGCTAGTGGCCACGATAGAACCGGTCCTAT |
| A4-1  | TCGAAGACATGCTGGCGGCCACGATAGAACCGGTCCTAT |
| A5    | TCGAAGACATGCTGACAACCACGATAGAACCGGTCCTAT |
| A5-1  | TCGAAGACATGCTGACGACCACGATAGAACCGGTCCTA- |
| A6    | TCGAAGACATGCTGACGGTTACGATAGAACCGGTCCTAT |
| B1    | TCGAAGACATGCTGACGGCCGTAGCTTGGCCGGCTTCGC |
| B1-1  | TC-AAGACATGCTGACGGCCGTAGCTTGACCGG-TTCG- |
| B1-2  | TCGAAGACATGCTGACGGCCGTAGTTTAGCCGG-T-CG- |
| B2    | TCGAAGACATGCTGACGGCCGTAGTAGAACCGGCTTCGC |
| B3    | TCGAAGACATGCTGACGGCCGTAGTAGAAATAACTTCGC |
| B3-1  | TCGAAGACATGCTGACGGCCGTAGTAGAAATGG-TTCG- |
| B3-2  | TCGAAGACATGCTGACGGCCGTAGTAGAAATAG-T-CG- |
| B4    | TCGAAGACATGCTGACGGCCGTAGTAGAACCGA-TTCG- |
| B5    | TC-AAGACATGCTGACGGCCGTAGTAGAACCGTTTTG-  |
| C52   | TCGAAGACATGCTGACGGCCGTAGTAGAACCGGTCCTAT |
| N1    | TC-AAGACATGCTAACGGCCGCGGTAGAACCGGTCCTA- |
| N2    | TC-AAGACATGCTGACGGCCGCGGTAGAACCGGTTCCA- |
| N3    | TC-AAGACATGCTGACGGCCGCGGCAGGACCGGTTCTG- |
| N4    | TC-AAGACATGCTGACGGCCGTGGTAGAACCGGTCCCA- |
| N5    | TC-AAGACATGCTAACGGCCGTGGTAGAACCGG-CCTA- |
| N6    | TC-AAGACATGCTAACGGCCGTGGTAGAACCGGTTCTA- |
| N7    | TCGAAGACATGCTAACGGCCGTAGTAGAACCGGTCCCA- |
| N8    | TC-AAGACATGCTGACGGCCGTAGTAGAACCGG-CTCGC |
| N9    | TC-AAGACATGCTAACGGCCGTGGC-GAACCGTTTTG-  |
| N10   | TC-AAGACATGCTAACGGCCGTGGTAGAACCGGTCTTG- |
| N11   | TC-AAGACATGCTGACGGCCGTGGTAGAACCGTTTTG-  |

**References**

1. **Campbell-Sills H, Khoury ME, Favier M, Romano A, Biasioli F, Spano G, Sherman DJ, Bouchez O, Coton E, Coton M, Okada S, Tanaka N, Dols-Lafargue M, Lucas**

- PM.** 2015. Phylogenomic analysis of *Oenococcus oeni* reveals specific domestication of strains to cider and wines. *Genome Biol Evol* **7**:1506–1518.
2. **Bilhère E, Lucas PM, Claisse O, Lonvaud-Funel A.** 2009. Multilocus sequence typing of *Oenococcus oeni*: detection of two subpopulations shaped by intergenic recombination. *Appl Environ Microbiol* **75**:1291–1300.
